# Supplementary material for: Anti-Bacterial and Anti-Fungal Activity of Xanthones Obtained via Semi-Synthetic Modification of α-Mangostin from Garcinia mangostana
Source: MDPI journal article supplement (doi:10.3390/molecules22020275), 2017-02-12
Supplement: s2 [file s2]

# Supplementary Materials: Anti-Bacterial and Anti-Fungal Activity of Xanthones Obtained via Semi-Synthetic Modification of $\alpha$ -Mangostin from *Garcinia mangostana*

Srinivasan Narasimhan, Shanmugam Maheshwaran, Imad A. Abu-Yousef, Amin F. Majdalawieh, Janarthanam Rethavathi, Prince Edwin Das and Palmiro Poltronieri

## Carcinogenicity (Genotox and Non Genotox) and Mutagenicity Release by Iss

### Ritter Product of $\alpha$ -Mangostin (I A)

- Q1. Normal constituent of the body: No
- Q2. Contains functional groups associated with enhanced toxicity: No
- Q3. Contains elements other than C,H,O,N, divalent S: No
- Q5. Simply branched aliphatic hydrocarbon or a common carbohydrate: No
- Q6. Benzene derivative with certain substituents: No
- Q7. Heterocyclic: Yes
- Q8. Lactone or cyclic diester: No
- Q10. 3-membered heterocycle: No
- Q11. Has a heterocyclic ring with complex substituents: Yes
- Q33. Has sufficient number of sulphonate or sulphamate groups: No Class High (Class III)
- Q Nongenotoxic alert? At least one alert for nongenotoxic carcinogenicity fired? No Class  
Negative for nongenotoxic carcinogenicity

### Ritter Product of $\alpha$ -Mangostin (I B)

- Q1. Normal constituent of the body: No
- Q2. Contains functional groups associated with enhanced toxicity: Yes Class High (Class III)
- Q Nongenotoxic alert? At least one alert for nongenotoxic carcinogenicity fired? No Class  
Negative for nongenotoxic carcinogenicity

### Ritter Product of Alpha Mangostin (I C)

- Q1. Normal constituent of the body: No
- Q2. Contains functional groups associated with enhanced toxicity: No
- Q3. Contains elements other than C,H,O,N, divalent S: No
- Q5. Simply branched aliphatic hydrocarbon or a common carbohydrate: No
- Q6. Benzene derivative with certain substituents: No
- Q7. Heterocyclic: Yes
- Q8. Lactone or cyclic diester: No
- Q10. 3-membered heterocycle: No
- Q11. Has a heterocyclic ring with complex substituents: Yes
- Q33. Has sufficient number of sulphonate or sulphamate groups: No Class High (Class III)
- Q Nongenotoxic alert? At least one alert for nongenotoxic carcinogenicity fired? No Class  
Negative for nongenotoxic carcinogenicity
